# Supplementary material
Source: PubMed Central journal article supplement (PMC3377074)
Supplement: emmm0003-0258-SD2.pdf [file emmm0003-0258-SD2.pdf]

| Patient | Phenotype | Mutation       | Age  | NSAA | Ambulant | Steroids |
|---------|-----------|----------------|------|------|----------|----------|
| DMD1    | DMD       | duplic 3-7     | 3,2  | 34   | yes      | no       |
| DMD2    | DMD       | duplic 14-22   | 2,5  | 34   | yes      | no       |
| DMD3    | DMD       | duplic 2       | 3,2  | 34   | yes      | no       |
| DMD4    | DMD       | point mut ex22 | 5,1  | 32   | yes      | no       |
| DMD5    | DMD       | point mut ex59 | 5    | 32   | yes      | no       |
| DMD6    | DMD       | delet 43       | 4,11 | 32   | yes      | no       |
| DMD7    | DMD       | delet prom     | 5,9  | 28   | yes      | yes      |
| DMD8    | DMD       | delet 48-52    | 6    | 27   | yes      | no       |
| DMD9    | DMD       | delet 46-48    | 5,7  | 25   | yes      | yes      |
| DMD10   | DMD       | delet 45-52    | 5,5  | 16   | yes      | yes      |
|         |           |                |      |      |          |          |
| DMD11   | DMD       | delet 45-50    | 8,4  | 0    | no       | yes      |
| DMD12   | DMD       | delet 52       | 12,6 | 2    | no       | yes      |
| DMD13   | DMD       | macrodel       | 10,1 | 23   | yes      | yes      |
| DMD14   | DMD       | duplic 3-7     | 8,1  | 34   | yes      | yes      |
| DMD15   | DMD       | delet 51-53    | 8,3  | 18   | yes      | yes      |
| DMD16   | DMD       | delet 49-50    | 9,2  | 20   | yes      | yes      |
| DMD17   | DMD       | delet 6        | 3,6  | N/A  | yes      | no       |
| DMD18   | DMD       | delet 10-11    | 3    | N/A  | yes      | no       |
| DMD19   | DMD       | delet 63       | 3,2  | N/A  | yes      | no       |
| DMD20   | DMD       | duplic 46      | 1    | N/A  | N/A      | no       |
| DMD21   | DMD       | point mut      | 1,8  | N/A  | yes      | no       |
| DMD22   | DMD       | duplic 45-54   | 2,3  | N/A  | yes      | no       |
| DMD23   | DMD       | delet 45-47    | 6,7  | 33   | yes      | no       |
| DMD24   | DMD       | delet 46-47    | 6,2  | 33   | yes      | yes      |
| DMD25   | DMD       | point mut ex70 | 8,9  | 30   | yes      | yes      |
| DMD26   | DMD       | point mut      | 14   | 0    | no       | no       |
|         |           |                |      |      |          |          |
| BMD1    | BMD       | del 45-48      | 3,2  | 34   | yes      | no       |
| BMD2    | BMD       | del 45-47      | 16,1 | 34   | yes      | no       |
| BMD3    | BMD       | del 45-48      | 14,2 | 34   | yes      | no       |
| BMD4    | BMD       | N/A            | 8,4  | 34   | yes      | no       |
| BMD5    | BMD       | N/A            | 5,4  | 34   | yes      | no       |

N/A: not applicable/available

## Supplementary Table 1

Supplementary Table 1: the table shows the list of patients recruited in this study with the type of DMD mutations, the age, NSAA score (for non ambulant patient NSAA score is 0 ), ambulation and steroid treatments. All patients are male as well as age matched healthy controls.

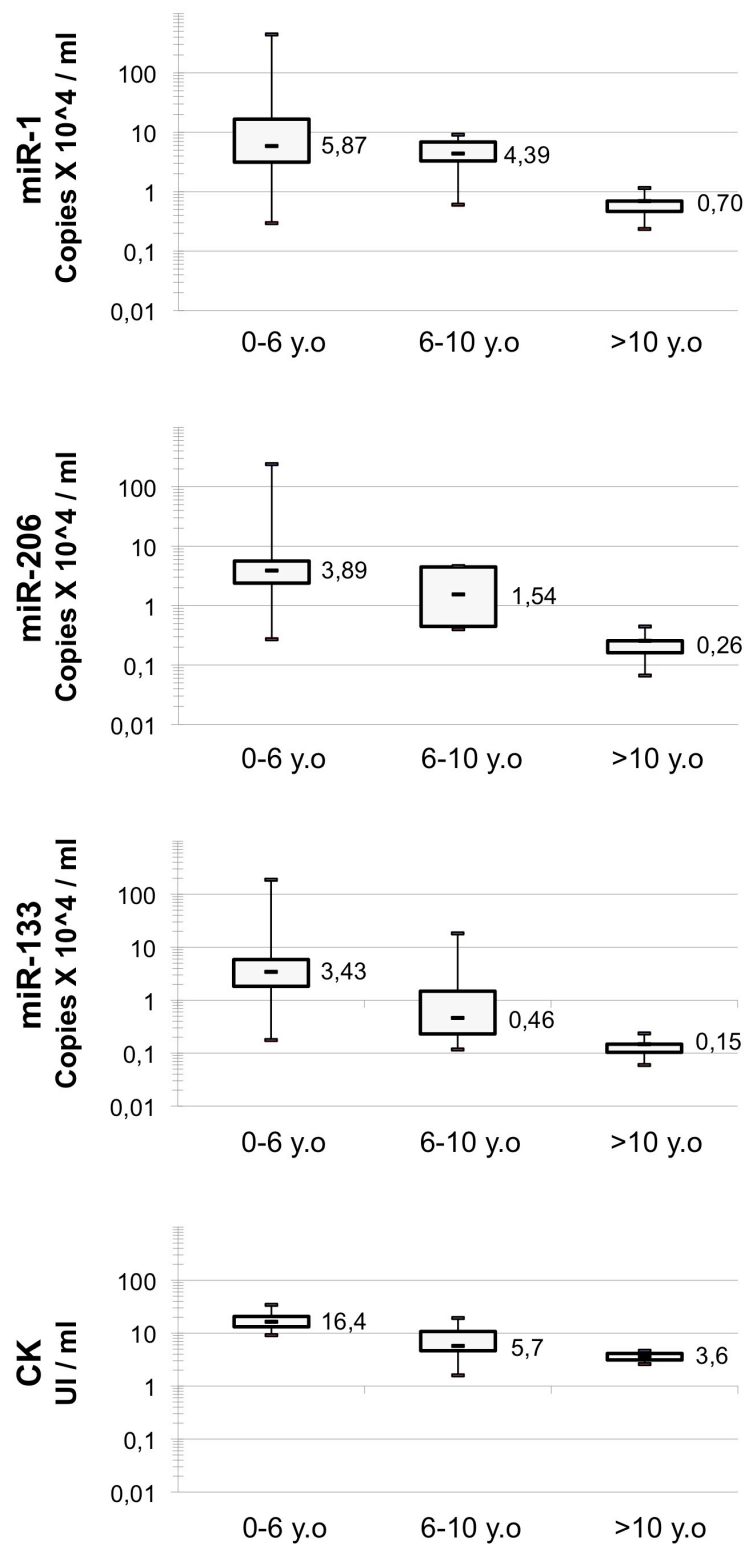

Supplementary Figure 1

Supplementary Figure 1: Box plots comparing microRNA and CK levels in the sera of DMD patients clustered according to their age. miRNA values were normalized for 3 spiked miRNAs (ath-miR-159a, cel-lin-2 and cel-lin-4) and shown as copy number *per ml* of serum while CK values are shown as Units *per ml* of serum.
